# Supplementary material for: Synthesis and kinetic studies of a low-molecular weight organocatalyst for phosphate hydrolysis in water
Source: Royal Society of Chemistry journal article supplement (doi:10.1039/b914974k), 2009-01-01
Supplement: b914974k.pdf [file b914974k.pdf]

## SUPPORTING INFORMATION

### Synthesis and kinetic studies of a low-molecular weight organocatalyst for phosphate hydrolysis in water

Michael Merschky,<sup>a</sup> and Carsten Schmuck\*<sup>a</sup>

<sup>a</sup> Institute for Organic Chemistry, University of Duisburg-Essen, Universitätsstrasse 7, 45141 Essen, Germany.

Fax: (+49) 201 183 4259 Tel: +492011833097; E-mail: [carsten.schmuck@uni-due.de](mailto:carsten.schmuck@uni-due.de)

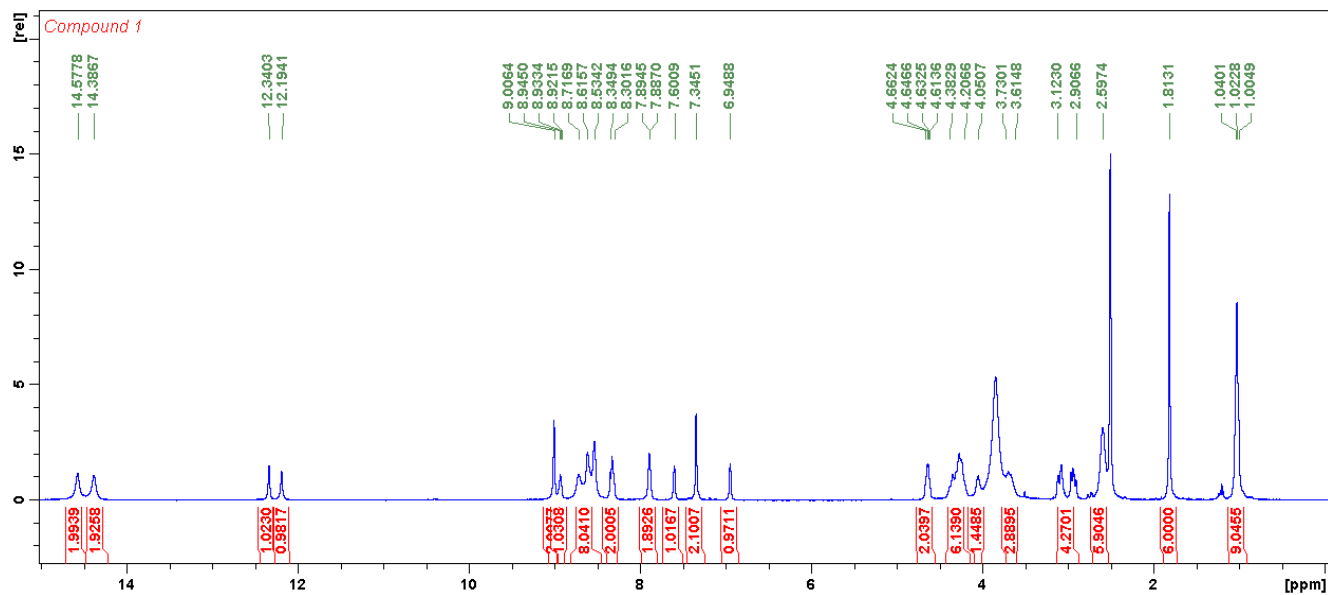

Fig. 1 <sup>1</sup>H-NMR spectra of compound 1.

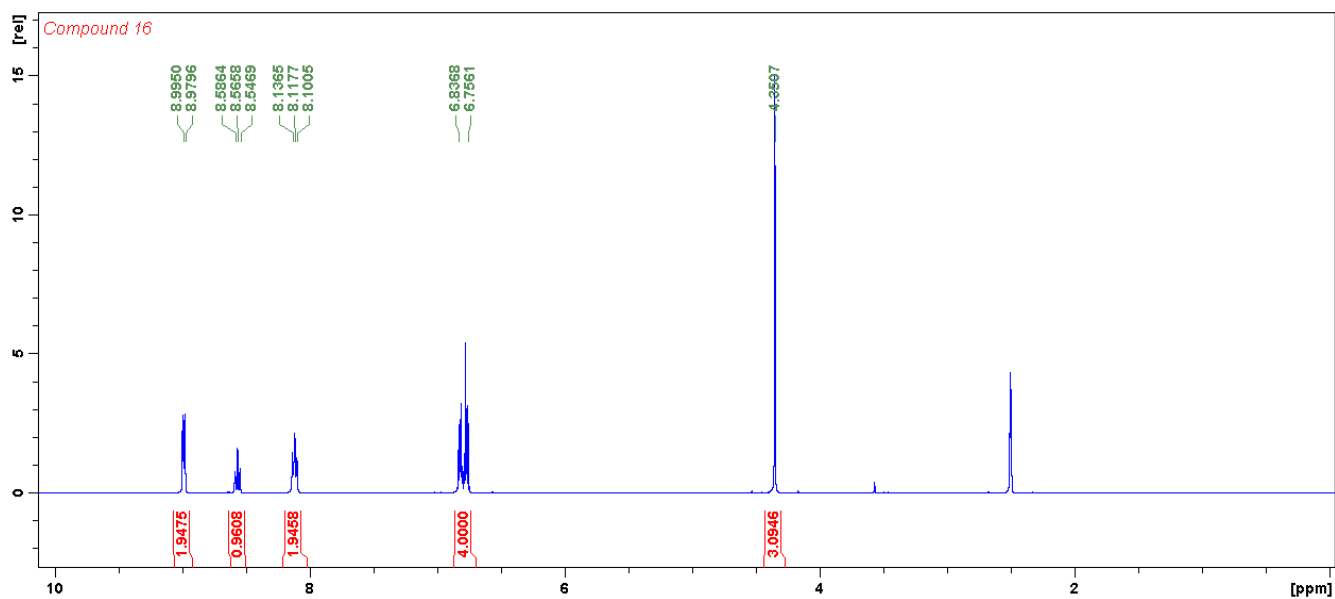

Fig. 2 <sup>1</sup>H-NMR spectra of compound 16, counter ion is *N*-methylpyridine.
